# Supplementary material
Source: Elsevier journal article supplement (https://hal.science/hal-01477155v1/file/mmc1.zip)
Supplement: mmc1 [file mmc1.zip]

Archive with 2 entries (2 files):
- ccdc_deposit.cif
- checkcif-CCDC-deposit.pdf
