# Supplementary material
Source: Elsevier journal article supplement (https://hal.science/hal-01477155v1/file/mmc1.zip)
Supplement: mmc1 [file mmc1.zip › ccdc_deposit.cif]

#\#CIF_1.1
 
#  CIF produced by WinGX routine CIF_UPDATE
#  Created on 2016-04-15 at 08:17:55
#  Using CIFtbx version 3.0.4  1 Sep 2006
 
#  Dictionary name : cif_core.dic
#  Dictionary vers : 2.4.3
#  Request file    : c:\wingx\files\archive.reqdat
#  CIF files read  : shelx absorb project
 
#------------------ SECTION 1. GLOBAL INFORMATION ---------------------------#
 
data_global
 
#------------------ AUDIT DETAILS -------------------------------------------#
 
_audit_creation_date            2016-04-15
_audit_creation_method          'WinGX routine CIF_UPDATE'
_audit_conform_dict_name        cif_core.dic
_audit_conform_dict_version     2.4
_audit_conform_dict_location    ftp://ftp.iucr.org/pub/cif_core.dic
_audit_update_record            ?
 
#==============================================================================
#
# SUBMISSION DETAILS
# Name and address of author for correspondence
 
_publ_contact_author_name       ' ,  '
_publ_contact_author_address
;
 
;
_publ_contact_author_email       ' '
_publ_contact_author_fax         ' '
_publ_contact_author_phone       ' '
 
 
_publ_contact_letter
;
 Submission dated :2016-04-15
 
Please consider this CIF for submission to the Cambridge Crystallographic
Data Centre. I certify that all authors have seen and approved of this
submission, that all have made significant scientific contributions to the
work reported, and that all share responsibility and accountability for
the results.
 
This CIF  is submitted as a personal communication
 
This CIF is submitted as part of a journal submission
<Insert Journal details here>
 
<Insert NAME here>
;
 
 
#==============================================================================
#
# TITLE AND AUTHOR LIST
 
_publ_section_title
; ?
;
_publ_section_title_footnote
; ?
;
 
# The loop structure below should contain the names and addresses of all
# authors, in the required order of publication. Repeat as necessary.
 
loop_
 _publ_author_name
 _publ_author_footnote
 _publ_author_address
?
?
;?
;
 
#------------------  SECTION 2. COMPOUND(S) DETAILS -------------------------#
 
data_shelx
 
_audit_creation_date                    2016-04-15T08:17:55-00:00
_audit_creation_method                  'WinGX routine CIF_UPDATE'
 
#----------------------------------------------------------------------------#
#                   CHEMICAL INFORMATION                                     #
#----------------------------------------------------------------------------#
 
_chemical_name_systematic
;
 ?
;
_chemical_formula_sum                   'C15 H20 La O10'
_chemical_formula_weight                499.22
 
#----------------------------------------------------------------------------#
#                   UNIT CELL INFORMATION                                    #
#----------------------------------------------------------------------------#
 
_symmetry_cell_setting                  monoclinic
_symmetry_space_group_name_H-M          'C 2/c'
_symmetry_space_group_name_Hall         '-C 2yc'
_symmetry_Int_Tables_number             15
loop_
    _symmetry_equiv_pos_as_xyz
'x, y, z'
'-x, y, -z+1/2'
'x+1/2, y+1/2, z'
'-x+1/2, y+1/2, -z+1/2'
'-x, -y, -z'
'x, -y, z-1/2'
'-x+1/2, -y+1/2, -z'
'x+1/2, -y+1/2, z-1/2'
 
_cell_length_a                          28.1295(5)
_cell_length_b                          15.2305(3)
_cell_length_c                          8.76070(10)
_cell_angle_alpha                       90
_cell_angle_beta                        98.8350(10)
_cell_angle_gamma                       90
_cell_volume                            3708.78(11)
_cell_formula_units_Z                   8
_cell_measurement_temperature           293(2)
_cell_measurement_reflns_used           6646
_cell_measurement_theta_min             2.91
_cell_measurement_theta_max             32.03
_cell_measurement_wavelength            0.71073
 
#----------------------------------------------------------------------------#
#                   CRYSTAL INFORMATION                                      #
#----------------------------------------------------------------------------#
 
_exptl_crystal_description              plate
_exptl_crystal_colour                   colourless
_exptl_crystal_size_max                 0.2
_exptl_crystal_size_mid                 0.18
_exptl_crystal_size_min                 0.05
_exptl_crystal_density_diffrn           1.788
_exptl_crystal_density_method           'not measured'
_exptl_crystal_F_000                    1976
loop_
    _exptl_crystal_face_index_h
    _exptl_crystal_face_index_k
    _exptl_crystal_face_index_l
    _exptl_crystal_face_perp_dist
1 0 0 0.089
-8 -2 -3 0.109
0 1 0 0.079
0 -1 0 0.059
3 2 -1 0.123
-17 -16 7 0.116
-6 5 3 0.123
2 1 17 0.109
3 1 -6 0.116
-3 -1 0 0.082
-4 1 0 0.052
-1 5 -4 0.102
4 -3 1 0.111
 
_exptl_special_details
;
 ?
;
 
#----------------------------------------------------------------------------#
#                   ABSORPTION CORRECTION                                    #
#----------------------------------------------------------------------------#
 
_exptl_absorpt_coefficient_mu           2.353
_exptl_absorpt_correction_type          gaussian
_exptl_absorpt_process_details
;
        a grid of  8 x  8 x  8 =   512 sampling points was used
;
_exptl_absorpt_correction_T_min         0.6477
_exptl_absorpt_correction_T_max         0.7683
 
#----------------------------------------------------------------------------#
#                   DATA COLLECTION                                          #
#----------------------------------------------------------------------------#
 
_diffrn_source                          'Enraf Nonius FR590'
_diffrn_ambient_temperature             293(2)
_diffrn_radiation_wavelength            0.71073
_diffrn_radiation_type                  MoK\a
_diffrn_radiation_monochromator         'horizonally mounted graphite crystal'
_diffrn_radiation_probe                 x-ray
_diffrn_detector                        'CCD plate'
_diffrn_detector_area_resol_mean        9
_diffrn_orient_matrix_ub_11             0.01
_diffrn_orient_matrix_ub_12             0
_diffrn_orient_matrix_ub_13             0
_diffrn_orient_matrix_ub_21             0
_diffrn_orient_matrix_ub_22             0.01
_diffrn_orient_matrix_ub_23             0
_diffrn_orient_matrix_ub_31             0
_diffrn_orient_matrix_ub_32             0
_diffrn_orient_matrix_ub_33             0.01
_diffrn_measurement_device              '95mm CCD camera on \k-goniostat'
_diffrn_measurement_device_type         KappaCCD
_diffrn_measurement_method              'CCD rotation images, thick slices'
_diffrn_reflns_av_R_equivalents         0.044
_diffrn_reflns_number                   22015
_diffrn_reflns_limit_h_min              -41
_diffrn_reflns_limit_h_max              38
_diffrn_reflns_limit_k_min              -20
_diffrn_reflns_limit_k_max              22
_diffrn_reflns_limit_l_min              -13
_diffrn_reflns_limit_l_max              13
_diffrn_reflns_theta_min                2.931
_diffrn_reflns_theta_max                32.053
_diffrn_reflns_theta_full               25.242
_diffrn_measured_fraction_theta_full
                                        0.997
_diffrn_measured_fraction_theta_max
                                        0.996
_diffrn_reflns_Laue_measured_fraction_full
                                        0.997
_diffrn_reflns_Laue_measured_fraction_max
                                        0.996
_diffrn_reflns_point_group_measured_fraction_full
                                        0.997
_diffrn_reflns_point_group_measured_fraction_max
                                        0.996
_reflns_number_total                    6440
_reflns_number_gt                       4949
_reflns_threshold_expression            'I > 2\s(I)'
_diffrn_reflns_reduction_process
;
        Scaled and merged with Sortav
        R.H. Blessing, (1987) Cryst. Rev. 1, 3-58
        R.H. Blessing, (1989) J. Appl. Cryst. 22, 396-397
;
 
#----------------------------------------------------------------------------#
#                   COMPUTER PROGRAMS USED                                   #
#----------------------------------------------------------------------------#
 
_computing_data_collection              'Collect (Bruker AXS BV, 1997-2004)'
_computing_cell_refinement
                                  'Dirax/lsq (Duisenberg & Schreurs, 1989-2000)'
_computing_data_reduction
                                     'EvalCCD (Duisenberg & Schreurs 1990-2000)'
_computing_structure_solution           'SHELXS-2013 (Sheldrick, 2008)'
_computing_structure_refinement         'SHELXL-2014 (Sheldrick, 2014)'
_computing_molecular_graphics           'Ortep for Windows (Farrugia, 2012)'
_computing_publication_material
                                   'WinGX publication routines (Farrugia, 2012)'
 
#----------------------------------------------------------------------------#
#                   STRUCTURE SOLUTION
#----------------------------------------------------------------------------#
 
_atom_sites_solution_hydrogens          geom
 
#----------------------------------------------------------------------------#
#                   REFINEMENT INFORMATION                                   #
#----------------------------------------------------------------------------#
 
_refine_special_details
;
 ?
;
_refine_ls_structure_factor_coef        Fsqd
_refine_ls_matrix_type                  full
_refine_ls_weighting_scheme             calc
_refine_ls_weighting_details
             'w=1/[\s^2^(Fo^2^)+(0.0540P)^2^+10.7620P] where P=(Fo^2^+2Fc^2^)/3'
_refine_ls_hydrogen_treatment           constr
_refine_ls_extinction_method            none
_refine_ls_number_reflns                6440
_refine_ls_number_parameters            235
_refine_ls_number_restraints            0
_refine_ls_number_constraints           0
_refine_ls_R_factor_all                 0.0566
_refine_ls_R_factor_gt                  0.0393
_refine_ls_wR_factor_ref                0.1104
_refine_ls_wR_factor_gt                 0.0994
_refine_ls_goodness_of_fit_ref          1.03
_refine_ls_restrained_S_all             1.03
_refine_ls_shift/su_max                 0.002
_refine_ls_shift/su_mean                0
_refine_diff_density_max                1.944
_refine_diff_density_min                -1.647
_refine_diff_density_rms                0.134
 
#----------------------------------------------------------------------------#
#                   ATOMIC TYPES, COORDINATES AND THERMAL PARAMETERS         #
#----------------------------------------------------------------------------#
 
loop_
    _atom_type_symbol
    _atom_type_description
    _atom_type_scat_dispersion_real
    _atom_type_scat_dispersion_imag
    _atom_type_scat_source
C C 0.0033 0.0016 'International Tables Vol C Tables 4.2.6.8 and 6.1.1.4'
H H 0 0 'International Tables Vol C Tables 4.2.6.8 and 6.1.1.4'
O O 0.0106 0.006 'International Tables Vol C Tables 4.2.6.8 and 6.1.1.4'
La La -0.2871 2.4523 'International Tables Vol C Tables 4.2.6.8 and 6.1.1.4'
 
loop_
    _atom_site_label
    _atom_site_type_symbol
    _atom_site_fract_x
    _atom_site_fract_y
    _atom_site_fract_z
    _atom_site_U_iso_or_equiv
    _atom_site_adp_type
    _atom_site_occupancy
    _atom_site_calc_flag
    _atom_site_disorder_assembly
    _atom_site_disorder_group
La01 La 0.16754(2) 0.01363(2) 0.64202(2) 0.02795(7) Uani 1 d . .
O002 O 0.28678(9) 0.47302(16) 0.6020(2) 0.0325(5) Uani 1 d . .
O003 O 0.21560(11) -0.12693(18) 0.5899(3) 0.0425(6) Uani 1 d . .
O004 O 0.24528(9) 0.42920(17) 0.3828(2) 0.0347(5) Uani 1 d . .
O007 O 0.11821(10) -0.0266(2) 0.3895(3) 0.0419(6) Uani 1 d . .
O005 O 0.12331(11) -0.1310(2) 0.7067(3) 0.0525(7) Uani 1 d . .
O006 O 0.08153(9) -0.0694(2) 0.1629(3) 0.0459(7) Uani 1 d . .
O008 O 0.16061(10) 0.17468(18) 0.5375(3) 0.0421(6) Uani 1 d . .
O009 O 0.18060(11) 0.16019(18) 0.7881(3) 0.0442(6) Uani 1 d . .
C010 C 0.13347(14) 0.3547(3) 0.5612(4) 0.0420(8) Uani 1 d . .
O014 O 0.21059(19) -0.2529(3) 0.8105(4) 0.0919(14) Uani 1 d . .
O013 O 0.04194(16) -0.1307(4) 0.8572(4) 0.0992(16) Uani 1 d . .
C017 C 0.01870(13) -0.1777(3) 0.3135(4) 0.0434(9) Uani 1 d . .
C016 C 0.08236(13) -0.0622(3) 0.3059(4) 0.0404(8) Uani 1 d . .
C015 C 0.15587(13) 0.4267(3) 0.5112(4) 0.0402(8) Uani 1 d . .
C020 C 0.24689(12) 0.4520(2) 0.5199(3) 0.0324(6) Uani 1 d . .
C021 C 0.16613(13) 0.2067(3) 0.6716(4) 0.0370(7) Uani 1 d . .
C023 C 0.04051(15) -0.0945(4) 0.3810(4) 0.0567(13) Uani 1 d . .
H02A H 0.0515 -0.1035 0.4904 0.085 Uiso 1 calc . .
H02B H 0.0159 -0.0494 0.3712 0.085 Uiso 1 calc . .
C022 C 0.1323(2) 0.4727(3) 0.3842(6) 0.0657(14) Uani 1 d . .
H022 H 0.1464 0.5235 0.3529 0.079 Uiso 1 calc . .
C025 C 0.20156(18) 0.4646(4) 0.5926(6) 0.0687(16) Uani 1 d . .
H02C H 0.2074 0.4396 0.6957 0.103 Uiso 1 calc . .
H02D H 0.1967 0.5271 0.604 0.103 Uiso 1 calc . .
C024 C 0.1539(2) 0.3007(3) 0.7018(5) 0.0662(14) Uani 1 d . .
H02E H 0.1828 0.3295 0.7526 0.099 Uiso 1 calc . .
H02F H 0.1308 0.3011 0.7734 0.099 Uiso 1 calc . .
C011 C 0.08975(19) 0.3290(5) 0.4830(7) 0.086(2) Uani 1 d . .
H011 H 0.0746 0.28 0.5168 0.103 Uiso 1 calc . .
C018 C 0.0166(6) -0.3344(5) 0.3121(16) 0.205(12) Uani 1 d . .
H018 H 0.0272 -0.3875 0.3574 0.245 Uiso 1 calc . .
C019 C 0.0678(2) 0.3741(7) 0.3556(9) 0.113(3) Uani 1 d . .
H019 H 0.0382 0.3554 0.3044 0.136 Uiso 1 calc . .
C026 C 0.0357(3) -0.2578(5) 0.3751(9) 0.106(3) Uani 1 d . .
H026 H 0.0601 -0.2592 0.4597 0.127 Uiso 1 calc . .
C012 C 0.0891(2) 0.4460(5) 0.3038(7) 0.089(2) Uani 1 d . .
H012 H 0.0748 0.476 0.2163 0.107 Uiso 1 calc . .
 
loop_
    _atom_site_aniso_label
    _atom_site_aniso_U_11
    _atom_site_aniso_U_22
    _atom_site_aniso_U_33
    _atom_site_aniso_U_23
    _atom_site_aniso_U_13
    _atom_site_aniso_U_12
La01 0.03736(11) 0.03138(11) 0.01417(9) 0.00009(5) 0.00099(6) 0.00226(7)
O002 0.0403(13) 0.0389(14) 0.0165(9) -0.0010(8) -0.0013(8) -0.0042(10)
O003 0.0672(17) 0.0332(13) 0.0268(11) -0.0007(9) 0.0065(11) 0.0065(12)
O004 0.0403(13) 0.0427(14) 0.0199(9) -0.0035(9) 0.0006(8) -0.0037(10)
O007 0.0383(14) 0.0651(19) 0.0210(11) -0.0087(10) 0.0008(9) -0.0091(12)
O005 0.0591(18) 0.0552(19) 0.0413(15) 0.0026(13) 0.0016(12) -0.0118(14)
O006 0.0450(14) 0.073(2) 0.0193(10) -0.0054(11) 0.0034(9) -0.0154(13)
O008 0.0630(17) 0.0390(15) 0.0243(11) 0.0024(10) 0.0065(10) 0.0067(12)
O009 0.0703(18) 0.0361(14) 0.0253(11) 0.0011(10) 0.0042(11) 0.0059(12)
C010 0.045(2) 0.0338(19) 0.0456(19) 0.0043(15) 0.0009(15) 0.0033(15)
O014 0.165(4) 0.060(2) 0.062(2) 0.0246(18) 0.053(2) 0.033(3)
O013 0.079(3) 0.154(5) 0.064(2) -0.027(3) 0.0096(19) -0.028(3)
C017 0.041(2) 0.045(2) 0.049(2) 0.0175(16) 0.0184(15) 0.0091(15)
C016 0.0377(18) 0.061(3) 0.0215(14) -0.0051(14) 0.0023(12) -0.0050(16)
C015 0.0411(19) 0.044(2) 0.0382(17) -0.0090(15) 0.0155(14) -0.0048(15)
C020 0.0420(17) 0.0324(17) 0.0219(13) -0.0014(11) 0.0023(11) -0.0101(13)
C021 0.049(2) 0.0328(18) 0.0291(15) 0.0039(12) 0.0063(13) -0.0005(14)
C023 0.043(2) 0.103(4) 0.0243(16) -0.0080(19) 0.0059(14) -0.020(2)
C022 0.106(4) 0.043(3) 0.054(3) 0.009(2) 0.031(3) -0.003(3)
C025 0.057(3) 0.108(4) 0.045(2) -0.031(3) 0.021(2) -0.030(3)
C024 0.116(4) 0.034(2) 0.042(2) -0.0020(17) -0.009(2) 0.014(2)
C011 0.053(3) 0.104(5) 0.095(4) 0.028(4) -0.004(3) -0.037(3)
C018 0.32(3) 0.053(4) 0.31(2) 0.076(8) 0.24(2) 0.084(9)
C019 0.039(3) 0.178(9) 0.112(5) 0.046(6) -0.023(3) -0.004(4)
C026 0.106(5) 0.094(5) 0.132(6) 0.073(5) 0.070(4) 0.058(4)
C012 0.075(4) 0.111(5) 0.076(4) 0.035(4) -0.007(3) 0.037(4)
 
 
#----------------------------------------------------------------------------#
#                   MOLECULAR GEOMETRY                                       #
#----------------------------------------------------------------------------#
 
_geom_special_details
;
 All esds (except the esd in the dihedral angle between two l.s. planes)
 are estimated using the full covariance matrix.  The cell esds are taken
 into account individually in the estimation of esds in distances, angles
 and torsion angles; correlations between esds in cell parameters are only
 used when they are defined by crystal symmetry.  An approximate (isotropic)
 treatment of cell esds is used for estimating esds involving l.s. planes.
;
loop_
    _geom_bond_atom_site_label_1
    _geom_bond_atom_site_label_2
    _geom_bond_distance
    _geom_bond_site_symmetry_2
    _geom_bond_publ_flag
La01 O002 2.486(2) 4_546 ?
La01 O007 2.501(2) . ?
La01 O009 2.571(3) . ?
La01 O006 2.597(3) 6_556 ?
La01 O003 2.609(3) . ?
La01 O008 2.615(3) . ?
La01 O005 2.634(3) . ?
La01 O004 2.643(2) 7_556 ?
La01 O002 2.666(2) 7_556 ?
La01 O007 2.755(3) 6_556 ?
La01 C021 2.952(4) . ?
La01 C020 3.022(3) 7_556 ?
O002 C020 1.277(4) . ?
O002 La01 2.486(2) 4_556 ?
O002 La01 2.666(2) 7_556 ?
O004 C020 1.244(4) . ?
O004 La01 2.643(2) 7_556 ?
O007 C016 1.272(4) . ?
O007 La01 2.755(3) 6 ?
O006 C016 1.254(4) . ?
O006 La01 2.597(3) 6 ?
O008 C021 1.259(4) . ?
O009 C021 1.257(4) . ?
C010 C015 1.370(5) . ?
C010 C011 1.370(6) . ?
C010 C024 1.519(5) . ?
C017 C026 1.388(7) . ?
C017 C017 1.409(8) 2 ?
C017 C023 1.490(6) . ?
C016 C023 1.517(5) . ?
C016 La01 3.067(4) 6 ?
C015 C022 1.393(7) . ?
C015 C025 1.487(6) . ?
C020 C025 1.522(6) . ?
C020 La01 3.022(3) 7_556 ?
C021 C024 1.505(6) . ?
C022 C012 1.369(9) . ?
C011 C019 1.373(8) . ?
C018 C018 1.32(3) 2 ?
C018 C026 1.365(14) . ?
C019 C012 1.358(10) . ?
 
loop_
    _geom_angle_atom_site_label_1
    _geom_angle_atom_site_label_2
    _geom_angle_atom_site_label_3
    _geom_angle
    _geom_angle_site_symmetry_1
    _geom_angle_site_symmetry_3
    _geom_angle_publ_flag
O002 La01 O007 151.28(10) 4_546 . ?
O002 La01 O009 75.66(8) 4_546 . ?
O007 La01 O009 132.12(9) . . ?
O002 La01 O006 112.08(7) 4_546 6_556 ?
O007 La01 O006 75.31(8) . 6_556 ?
O009 La01 O006 75.18(10) . 6_556 ?
O002 La01 O003 75.16(8) 4_546 . ?
O007 La01 O003 82.88(9) . . ?
O009 La01 O003 139.56(9) . . ?
O006 La01 O003 142.57(10) 6_556 . ?
O002 La01 O008 123.35(8) 4_546 . ?
O007 La01 O008 85.34(9) . . ?
O009 La01 O008 50.00(8) . . ?
O006 La01 O008 72.40(9) 6_556 . ?
O003 La01 O008 136.14(8) . . ?
O002 La01 O005 78.09(8) 4_546 . ?
O007 La01 O005 76.64(9) . . ?
O009 La01 O005 130.93(9) . . ?
O006 La01 O005 77.46(10) 6_556 . ?
O003 La01 O005 68.03(11) . . ?
O008 La01 O005 147.95(9) . . ?
O002 La01 O004 78.38(8) 4_546 7_556 ?
O007 La01 O004 113.81(8) . 7_556 ?
O009 La01 O004 72.03(9) . 7_556 ?
O006 La01 O004 141.65(10) 6_556 7_556 ?
O003 La01 O004 75.14(9) . 7_556 ?
O008 La01 O004 71.48(9) . 7_556 ?
O005 La01 O004 140.18(9) . 7_556 ?
O002 La01 O002 119.76(10) 4_546 7_556 ?
O007 La01 O002 65.14(8) . 7_556 ?
O009 La01 O002 106.46(8) . 7_556 ?
O006 La01 O002 126.92(7) 6_556 7_556 ?
O003 La01 O002 66.15(8) . 7_556 ?
O008 La01 O002 70.54(8) . 7_556 ?
O005 La01 O002 122.54(9) . 7_556 ?
O004 La01 O002 48.78(7) 7_556 7_556 ?
O002 La01 O007 63.96(8) 4_546 6_556 ?
O007 La01 O007 115.83(10) . 6_556 ?
O009 La01 O007 66.21(9) . 6_556 ?
O006 La01 O007 48.21(7) 6_556 6_556 ?
O003 La01 O007 122.27(8) . 6_556 ?
O008 La01 O007 100.87(8) . 6_556 ?
O005 La01 O007 65.13(9) . 6_556 ?
O004 La01 O007 128.84(7) 7_556 6_556 ?
O002 La01 O007 171.39(9) 7_556 6_556 ?
O002 La01 C021 100.40(9) 4_546 . ?
O007 La01 C021 107.99(10) . . ?
O009 La01 C021 25.12(8) . . ?
O006 La01 C021 69.06(10) 6_556 . ?
O003 La01 C021 147.86(10) . . ?
O008 La01 C021 25.23(8) . . ?
O005 La01 C021 143.22(10) . . ?
O004 La01 C021 72.80(9) 7_556 . ?
O002 La01 C021 90.53(9) 7_556 . ?
O007 La01 C021 81.03(9) 6_556 . ?
O002 La01 C020 97.35(9) 4_546 7_556 ?
O007 La01 C020 90.05(8) . 7_556 ?
O009 La01 C020 91.16(9) . 7_556 ?
O006 La01 C020 142.60(9) 6_556 7_556 ?
O003 La01 C020 65.69(9) . 7_556 ?
O008 La01 C020 72.25(9) . 7_556 ?
O005 La01 C020 133.02(10) . 7_556 ?
O004 La01 C020 24.21(7) 7_556 7_556 ?
O002 La01 C020 24.95(7) 7_556 7_556 ?
O007 La01 C020 153.00(8) 6_556 7_556 ?
C021 La01 C020 83.76(10) . 7_556 ?
C020 O002 La01 149.1(2) . 4_556 ?
C020 O002 La01 93.32(18) . 7_556 ?
La01 O002 La01 117.29(9) 4_556 7_556 ?
C020 O004 La01 95.2(2) . 7_556 ?
C016 O007 La01 153.7(2) . . ?
C016 O007 La01 91.6(2) . 6 ?
La01 O007 La01 113.61(10) . 6 ?
C016 O006 La01 99.6(2) . 6 ?
C021 O008 La01 92.5(2) . . ?
C021 O009 La01 94.6(2) . . ?
C015 C010 C011 119.3(4) . . ?
C015 C010 C024 123.9(4) . . ?
C011 C010 C024 116.8(4) . . ?
C026 C017 C017 118.5(5) . 2 ?
C026 C017 C023 119.8(5) . . ?
C017 C017 C023 121.7(2) 2 . ?
O006 C016 O007 120.2(3) . . ?
O006 C016 C023 120.6(3) . . ?
O007 C016 C023 119.2(3) . . ?
O006 C016 La01 56.61(18) . 6 ?
O007 C016 La01 63.88(18) . 6 ?
C023 C016 La01 174.8(3) . 6 ?
C010 C015 C022 118.2(4) . . ?
C010 C015 C025 124.3(4) . . ?
C022 C015 C025 117.2(5) . . ?
O004 C020 O002 120.8(3) . . ?
O004 C020 C025 122.0(3) . . ?
O002 C020 C025 116.9(3) . . ?
O004 C020 La01 60.58(17) . 7_556 ?
O002 C020 La01 61.73(17) . 7_556 ?
C025 C020 La01 162.5(3) . 7_556 ?
O009 C021 O008 121.2(4) . . ?
O009 C021 C024 116.6(3) . . ?
O008 C021 C024 122.2(3) . . ?
O009 C021 La01 60.2(2) . . ?
O008 C021 La01 62.2(2) . . ?
C024 C021 La01 165.8(3) . . ?
C017 C023 C016 113.8(3) . . ?
C012 C022 C015 122.4(5) . . ?
C015 C025 C020 117.9(3) . . ?
C021 C024 C010 116.2(3) . . ?
C010 C011 C019 121.4(6) . . ?
C018 C018 C026 121.2(6) 2 . ?
C012 C019 C011 120.6(6) . . ?
C018 C026 C017 120.2(8) . . ?
C019 C012 C022 118.0(5) . . ?
 
# The following lines are used to test the character set of files sent by
# network email or other means. They are not part of the CIF data set
# abcdefghijklmnopqrstuvwxyzABCDEFGHIJKLMNOPQRSTUVWXYZ0123456789
# !@#$%^&*()_+{}:"~<>?|\-=[];'`,./
 
# END of CIF
